# Supplementary material for: Anterior Chamber Measurements in Healthy Children: A Cross-Sectional Study Using Optical Coherence Tomography
Source: PubMed Central journal article supplement (PMC8114001; doi:10.1167/tvst.10.6.13), 2021-05-07
Supplement: tvst-10-6-13_s001.pdf [file tvst-10-6-13_s001.pdf]

**Table S1:** Demographics of healthy participants categorized by age group and the hand-held optical coherence tomography measurements per eye and angle.

| Age group          | Number | Mean $\pm$ SD         | Minimum | Maximum |
|--------------------|--------|-----------------------|---------|---------|
| < 1 week           | 11     | 2.30 $\pm$ 1.50 days  | 1 day   | 4 days  |
| 1 week - 0.9 month | 7      | 17.80 $\pm$ 3.10 days | 15 days | 23 days |
| 1 - 5.9 months     | 12     | 3.00 $\pm$ 1.50       | 0.80    | 5.80    |
| 6 - 11.9 months    | 11     | 9.10 $\pm$ 1.90       | 6.20    | 11.90   |
| 1 - 1.9 years      | 17     | 1.40 $\pm$ 0.30       | 1.03    | 1.96    |
| 2 - 2.9 years      | 20     | 2.33 $\pm$ 0.23       | 2.00    | 2.73    |
| 3 - 3.9 years      | 29     | 3.44 $\pm$ 0.29       | 3.04    | 3.92    |
| 4 - 4.5 years      | 18     | 4.34 $\pm$ 0.26       | 4.01    | 4.96    |
| 5 - 5.9 years      | 17     | 5.40 $\pm$ 0.26       | 5.02    | 5.77    |
| 6 - 6.9 years      | 18     | 6.47 $\pm$ 0.28       | 6.01    | 6.96    |
| 7 - 8.9 years      | 20     | 8.01 $\pm$ 0.46       | 7.18    | 8.72    |
| 9 - 11.9 years     | 24     | 10.57 $\pm$ 0.90      | 9.03    | 11.91   |
| 12 - 15.9 years    | 19     | 13.84 $\pm$ 1.13      | 12.06   | 15.43   |
| 16 - 19.9 years    | 15     | 17.55 $\pm$ 0.67      | 16.09   | 18.67   |
| $\geq$ 20 years    | 44     | 33.19 $\pm$ 7.41      | 21.11   | 47.06   |
| Total              | 282    |                       |         |         |

  

| Ethnicity           | Number (%) |
|---------------------|------------|
| White European      | 180 (64)   |
| White North African | 41 (15)    |
| Indian              | 47 (17)    |
| Mixed ethnicity     | 14 (5)     |

  

| Gender | Number    |
|--------|-----------|
| Female | 145 (51%) |
| Male   | 137 (49%) |

  

| Anterior chamber angle images (n = 1464) |           |                        |           |
|------------------------------------------|-----------|------------------------|-----------|
| Left eyes (number, %)                    |           | Right eyes (number, %) |           |
| 702 (48%)                                |           | 762 (52%)              |           |
| Temporal                                 | Nasal     | Temporal               | Nasal     |
| 350 (24%)                                | 352 (24%) | 369 (25%)              | 393 (27%) |

  

| Corneal images (n = 574) |                       |
|--------------------------|-----------------------|
| Left eye (number, %)     | Right eye (number, %) |
| 287 (50%)                | 287 (50%)             |
