# Supplementary material for: Anterior Chamber Measurements in Healthy Children: A Cross-Sectional Study Using Optical Coherence Tomography
Source: PubMed Central journal article supplement (PMC8114001; doi:10.1167/tvst.10.6.13), 2021-05-07
Supplement: tvst-10-6-13_s002.pdf [file tvst-10-6-13_s002.pdf]

**Table S2:** First order partial correlation between anterior chamber measurements and spherical power.

|                 |         | Anterior chamber angle measurements |                   |                   | Anterior chamber width |             | Central corneal thickness |
|-----------------|---------|-------------------------------------|-------------------|-------------------|------------------------|-------------|---------------------------|
|                 |         | TML                                 | SL-AOD            | SL-TISA           | SS-SS-D                | SL-SL-D     | CCT                       |
|                 |         | n = 800                             |                   |                   |                        |             | n = 289                   |
| Spherical power | r       | 0.02                                | -0.26             | -0.24             | 0.10                   | 0.08        | -0.13                     |
|                 | $\beta$ | 2.38                                | -43.25            | -0.02             | 0.05                   | 0.03        | -4.63                     |
|                 | p value | Ns                                  | <b>&lt;0.0001</b> | <b>&lt;0.0001</b> | <b>0.004</b>           | <b>0.03</b> | <b>0.002</b>              |

TML = trabecular meshwork length SL-AOD = Schwalbe's line angle opening distance. SL-TISA = Schwalbe's line trabecular iris surface area. ACW = anterior chamber width; SS-SS-D = nasal scleral spur to temporal scleral spur distance. SL-SL-D = nasal Schwalbe's line to temporal Schwalbe's line distance. CCT = central corneal thickness. Pearson correlation coefficient ( $r$ ), coefficient of difference ( $\beta$ ). The effect of age was adjusted,  $n$  = number of images, Ns = non-significant difference.
